# Supplementary material for: MicroRNA-29a attenuates CD8 T cell exhaustion and induces memory-like CD8 T cells during chronic infection
Source: PubMed Central journal article supplement — Proc Natl Acad Sci U S A. 2022 Apr 21;119(17):e2106083119. doi: 10.1073/pnas.2106083119 (PMC9169946; doi:10.1073/pnas.2106083119), 2022-04-21
Supplement: pnas.2106083119.sapp.pdf [file pnas.2106083119.sapp.pdf]

## Supplemental Figure Legends

### Supplementary Figure 1. miRs are differentially expressed during CD8 T cell differentiation in acute and chronic infection.

C57/BL6 mice were infected with either LCMV Armstrong ("acute") or LCMV clone 13 ("chronic"). At d8 and at d30 p.i. LCMV D<sup>b</sup> gp-33 specific CD8 T cells were purified from spleens and their miR profile was examined using Affymetrix microRNA 2.0 array. As a control, CD8 T cells from naïve mice were purified ("T<sub>N</sub>").

(A) Mean expression level and STDV for all the differentially expressed miRs (DEM; FDR<0.05) between T<sub>N</sub>, T<sub>EFF</sub> and T<sub>MEM</sub>.

(D) Mean expression level and STDV (B - C) Venn diagrams showing the differentially expressed miRs (DEM; FDR<0.05) between T<sub>N</sub>, T<sub>EFF</sub> and T<sub>MEM</sub> (B) and between T<sub>N</sub>, T<sub>EE</sub> and T<sub>EX</sub> (C). Red represents upregulation in the first group of the pairwise comparison; blue represents downregulation in the first group of the pairwise comparison.

or all the differentially expressed miRs (DEM; FDR<0.05) between T<sub>N</sub>, T<sub>EE</sub> and T<sub>EX</sub>.

(E) Venn diagram showing DEM (FDR<0.05) between T<sub>EFF</sub> vs T<sub>EE</sub> and T<sub>MEM</sub> vs T<sub>EX</sub>. Red represents upregulation in the first group of the pairwise comparison.

(F) MiR-29a expression levels and fold-changes in T<sub>N</sub>, T<sub>EFF</sub>, T<sub>MEM</sub>, T<sub>EE</sub> and T<sub>EX</sub>.

### Supplementary Figure 2. Key transcriptional pathways are implicated in miR differential regulation between acute and chronic infection.

(A-C) C57/BL6 mice were infected with LCMV Armstrong or clone 13. At d8 and at d30 p.i. LCMV D<sup>b</sup> gp-33 specific CD8 T cells were purified from spleens and their miR profile was examined as in Figure 1. (A) A network of miRs and their predicted targets that were DE between acute and chronic infection at d8 p.i. was constructed using the filtered miR-mRNA target list from Figure 2B. (B) Intracellular staining for Eomes in CD44<sup>+</sup> CD8 T cells from splenocytes of mice infected with LCMV Armstrong (grey filled histogram) or LCMV clone 13 (black open histogram) at d30 p.i. (C) Upstream regulators of DEM and target DEG from the filtered miR-mRNA target list from Figure 2B at d8 and at d30 p.i. (D) P14 cells were transduced with control (empty) RV or miR-29a RV. Transduction efficiency was measured by flow cytometry at 24 hrs post transduction. Mean % of VEX<sup>+</sup> cells out of total P14 ± SEM is shown (top black: control RV; bottom red: miR-29a OE RV). (E) CD45.1<sup>+</sup> P14 CD8 T cells were transduced with either control-VEX RV (ctrl) or miR-29a OE RV (miR) and adoptively transferred to CD45.2<sup>+</sup> recipient mice that were infected with LCMV clone 13 at 24 hrs earlier. Frequency and phenotype of donor VEX<sup>+</sup> P14 cells in spleens at d8 p.i. is shown.

(F-G) CD45.1<sup>+</sup> P14 CD8 T cells were transduced with either scrambled-GFP RV or miR-29a OE-GFP RV (miR) and adoptively transferred to CD45.2<sup>+</sup> recipient mice that were infected with LCMV clone 13 at 24 hrs earlier. At d30 p.i. the phenotype of the transferred and transduced cells was analyzed by flow cytometry. (F) FACS plots are gated on total P14 CD45.1<sup>+</sup> cells. (G) FACS plots are gated on GFP<sup>+</sup> P14 cells. Each data point represents an individual mouse. *P* values calculated with Mann-Whitney test.

**Supplementary Figure 3. The miR-29a effects on T<sub>EX</sub> differentiation are intrinsic to CD8 T cells and result in a T<sub>MEM</sub>-like transcriptional profile.**

(A-B) CD45.1+ P14 CD8 T cells were transduced with either control-VEX RV (ctrl) or miR-29a OE-VEX RV (miR) and adoptively transferred to CD45.2+ recipient mice that were infected with LCMV clone 13 at 24 hrs earlier. (A) Viral loads for LCMV were analyzed in the serum at d30 p.i. using plaque assay. (B) Expression of surface markers was analyzed on non-transduced (VEX negative) P14 cells at d30 p.i. in spleens.

(C) 10<sup>6</sup> CD8 T cells purified from splenocytes from CD45.2+ miR-29ab<sup>fl/fl</sup> CD4 Cre<sup>+</sup> (“miR-29a ko”) and littermate control wild-type (wt) mice were transferred to wild-type CD45.1 recipient mice that were infected with LCMV clone 13 at 24 hrs later. Donor wt or ko CD8 T cells were analyzed at d13 p.i. FACS plots are gated on donor CD45.2+ cells. Each data point represents an individual mouse.

(D) CD8 T cells were purified from spleens of WT mice and transduced with empty RV or miR-29a-OE RV (both expressing VEX as a reporter) and with a 3'UTR sensor GFP reporter RV (33) containing either *Gadph* 3'UTR or *Eomes* 3'UTR. 24h later, GFP expression was analyzed by flow cytometry. FACS plots are gated on VEX+ CD8 T cells.

(E) miR-29a-OE VEX+ P14 and control VEX+ P14 cells were sorted from spleens at d30 p.i. and quantitative RT-PCR was performed.

(F-I) RNASeq was performed using control or miR-29a-OE VEX+ P14 from d30 p.i. with LCMV clone 13 (as described in Figure 3). (F) GSEA for a geneset of predicted miR-29a targets (from MSigDB). (G) Leading edge genes significantly enriched in control vs miR-29a OE cells (from Fig. S3E). (H) GSEA for a geneset of T<sub>EFF</sub> vs T<sub>MEM</sub> (from MSigDB). (I) GSEA for a geneset of genes upregulated upon miR-155-OE (from Stelekati et al., 2018). Table shows leading edge genes significantly enriched in control vs miR-29a OE cells.

**Supplementary Figure 4. Fos and Tox OE antagonize the effects of miR-29 OE and miR-29a OE enhances CD8 T cell responses during acute infection**

(A) CD45.1+ P14 CD8 T cells were transduced with miR-29a-GFP RV and empty-VEX RV or Jun-VEX RV (OE Jun) or Fos-VEX RV (OE Fos) or Tox-VEX RV (OE Tox). P14 cells transduced with empty-GFP RV and empty-VEX RV served as negative control. 5 x 10<sup>4</sup> cells were adoptively transferred to CD45.2+ recipient mice that were infected with LCMV clone 13 at 24 hrs earlier. P14 cells transduced with both RV were identified as VEX+ GFP+ cells and analyzed at d14 p.i. FACS plots are gated on transferred CD45.1+ P14 cells. Histograms showing the phenotype of cells are gated on VEX+ GFP+ P14 cells. Each data point represents an individual mouse. Statistical significance was calculated using Kruskal-Wallis test with Dunn's multiple comparison post-test.

(B-D) CD45.1+ P14 CD8 T cells were transduced with either control-VEX RV (ctrl) or miR-29a OE-VEX RV (miR) and adoptively transferred to CD45.2+ recipient mice that were infected with LCMV Armstrong at 24 hrs earlier. (B) Expansion of transferred P14 cells at d35 p.i. in spleens. (C) Surface expression of CD127 and KLRG1 on VEX+ P14 cells (D) Cytokine production by VEX+ P14 cells after ex vivo 5hr re-stimulation with gp-33 peptide.

**Supplementary Table 1. Differentially expressed transcripts with FDR<0.05 between ctrl and miR-29a-OE CD8 T cells.**

P14 cells were transduced with miR-29-OE or control RV and adoptively transferred into congenically marked recipient mice as described in Fig. 3A. At d30 p.i., miR-29-OE and control VEX+ P14 cells were sorted by FACS and RNASeq was performed. Table shows transcripts differentially expressed between miR-29-OE and control VEX+ P14 cells with FDR<0.05.

**Supplementary Table 2. Pathway analysis reveals a role for miR-29a in regulating ribosomal pathways.**

RNASeq analysis was performed in miR-29-OE and control P14 CD8 T cells exposed to clone 13 infection for 30 d, as described in Fig. 3. GSEA was performed using the database MSigDB. Table shows pathways from the GO Molecular Functions database enriched with FDR<0.05.

**Supplementary Table 3. miR-29a abrogates the response to antigen signaling and inflammation.**

RNASeq analysis was performed in miR-29-OE and control P14 CD8 T cells exposed to clone 13 infection for 30 d, as described in Fig. 3. GSEA was performed using the database MSigDB. Table shows pathways from the Hallmark database enriched in control vs miR-29-OE P14 CD8 T cells (with FDR<0.05).

**Supplementary Table 4. GSEA analysis implicates major transcription factors regulation by miR-29a.**

RNASeq analysis was performed in miR-29-OE and control P14 CD8 T cells exposed to clone 13 infection for 30 d, as described in Fig. 3. GSEA was performed using the database MSigDB. Table shows pathways from the PID database enriched in control vs miR-29-OE P14 CD8 T cells (with FDR<0.05).

•

**Figure S1**

**A**

| microRNA         | TN    |      | TEFF |      | TMEM  |      |
|------------------|-------|------|------|------|-------|------|
|                  | mean  | STDV | mean | STDV | mean  | STDV |
| mmu-let-7b       | 10.84 | 0.50 | 6.87 | 0.54 | 10.29 | 0.10 |
| mmu-let-7c       | 10.88 | 0.54 | 7.51 | 0.55 | 10.63 | 0.11 |
| mmu-miR-130b     | 3.76  | 0.94 | 6.01 | 0.89 | 4.70  | 1.16 |
| mmu-miR-139-5p   | 5.89  | 0.80 | 3.11 | 0.75 | 7.11  | 0.32 |
| mmu-miR-140-star | 6.24  | 0.71 | 4.82 | 1.31 | 7.51  | 0.28 |
| mmu-miR-146a     | 3.79  | 1.16 | 8.77 | 1.06 | 10.26 | 0.72 |
| mmu-miR-155      | 5.56  | 0.75 | 8.03 | 0.70 | 8.59  | 0.80 |
| mmu-miR-181a     | 7.79  | 0.58 | 3.68 | 0.36 | 4.23  | 1.24 |
| mmu-miR-182      | 2.51  | 0.69 | 7.54 | 0.83 | 5.39  | 1.78 |
| mmu-miR-183      | 2.11  | 0.58 | 5.38 | 1.06 | 2.84  | 1.03 |
| mmu-miR-21       | 2.44  | 0.63 | 5.38 | 2.25 | 6.00  | 1.91 |
| mmu-miR-2137     | 4.34  | 1.41 | 7.89 | 1.18 | 7.13  | 0.53 |
| mmu-miR-221      | 3.42  | 0.67 | 4.91 | 1.47 | 5.95  | 0.87 |
| mmu-miR-222      | 2.87  | 0.57 | 4.79 | 1.25 | 4.75  | 1.37 |
| mmu-miR-26a      | 9.43  | 0.31 | 7.16 | 1.15 | 10.18 | 0.57 |
| mmu-miR-27b      | 4.54  | 0.72 | 6.58 | 1.43 | 6.78  | 1.39 |
| mmu-miR-29a      | 6.84  | 0.36 | 5.46 | 1.71 | 8.97  | 0.75 |
| mmu-miR-31       | 2.64  | 0.63 | 6.69 | 0.85 | 7.59  | 0.65 |
| mmu-miR-320      | 5.98  | 0.72 | 3.50 | 0.74 | 5.44  | 0.39 |
| mmu-miR-342-3p   | 9.84  | 0.26 | 6.90 | 0.41 | 9.47  | 0.31 |
| mmu-miR-342-5p   | 6.79  | 0.45 | 3.08 | 0.30 | 4.62  | 1.04 |
| mmu-miR-378      | 6.85  | 0.49 | 4.19 | 1.09 | 7.27  | 0.44 |

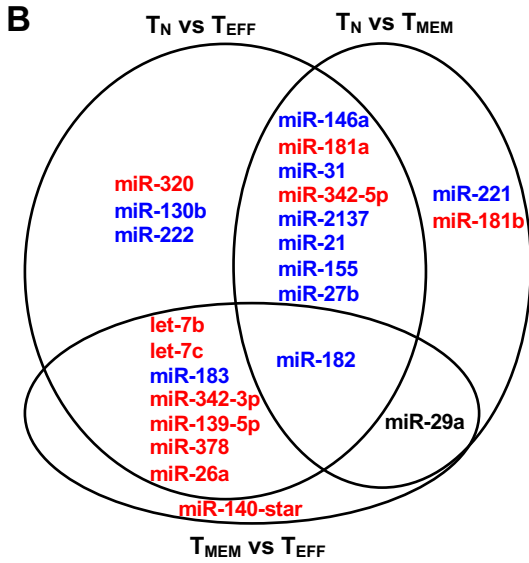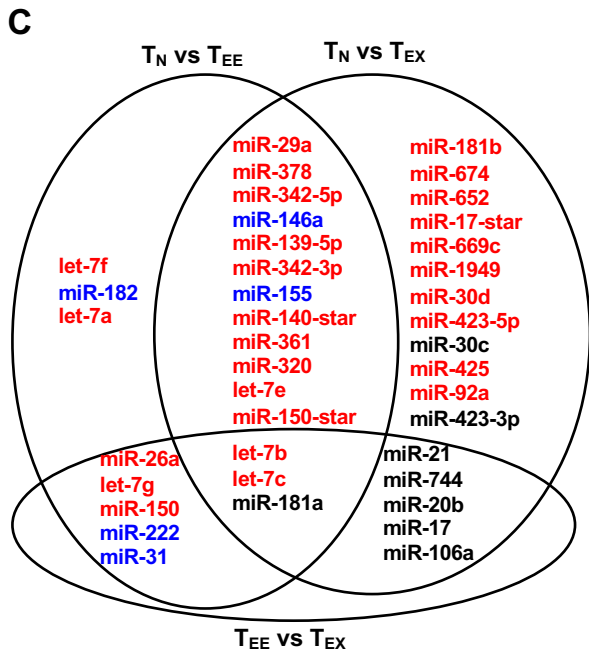

**D**

|                  | TN    |      | TEE  |      | TEX   |      |
|------------------|-------|------|------|------|-------|------|
|                  | mean  | STDV | mean | STDV | mean  | STDV |
| mmu-let-7a       | 9.81  | 0.49 | 7.45 | 0.41 | 9.10  | 0.97 |
| mmu-let-7b       | 10.84 | 0.50 | 6.07 | 0.20 | 8.40  | 0.74 |
| mmu-let-7c       | 10.88 | 0.54 | 6.23 | 0.32 | 8.85  | 0.71 |
| mmu-let-7e       | 4.40  | 1.34 | 2.31 | 0.40 | 2.23  | 1.91 |
| mmu-let-7f       | 6.49  | 0.52 | 3.61 | 0.61 | 5.04  | 2.38 |
| mmu-let-7g       | 7.23  | 0.44 | 4.35 | 0.59 | 6.50  | 1.55 |
| mmu-miR-106a     | 5.46  | 0.47 | 6.09 | 0.80 | 3.45  | 2.33 |
| mmu-miR-139-5p   | 5.89  | 0.80 | 2.32 | 0.36 | 3.34  | 2.44 |
| mmu-miR-140-star | 6.24  | 0.71 | 3.51 | 0.48 | 4.09  | 2.81 |
| mmu-miR-146a     | 3.79  | 1.16 | 7.39 | 0.88 | 8.41  | 0.99 |
| mmu-miR-150-star | 5.04  | 1.18 | 3.04 | 0.62 | 2.85  | 2.05 |
| mmu-miR-150      | 11.82 | 0.30 | 9.12 | 0.37 | 11.16 | 0.79 |
| mmu-miR-155      | 5.56  | 0.75 | 8.77 | 0.70 | 9.81  | 0.63 |
| mmu-miR-17-star  | 4.25  | 1.29 | 2.84 | 0.34 | 1.90  | 1.38 |
| mmu-miR-17       | 6.60  | 0.20 | 7.01 | 0.96 | 4.45  | 2.16 |
| mmu-miR-181a     | 7.79  | 0.58 | 4.06 | 0.58 | 2.01  | 1.38 |
| mmu-miR-181b     | 4.41  | 0.99 | 3.27 | 0.57 | 1.58  | 1.21 |
| mmu-miR-182      | 2.51  | 0.69 | 5.03 | 1.24 | 3.56  | 2.51 |
| mmu-miR-1949     | 4.27  | 0.81 | 3.87 | 0.54 | 2.09  | 1.35 |
| mmu-miR-20a      | 5.52  | 0.40 | 5.60 | 0.86 | 3.76  | 2.42 |
| mmu-miR-20b      | 5.40  | 0.51 | 5.23 | 0.97 | 3.18  | 2.40 |
| mmu-miR-21       | 2.44  | 0.63 | 3.32 | 0.59 | 6.37  | 2.14 |
| mmu-miR-222      | 2.87  | 0.57 | 5.07 | 0.58 | 2.86  | 2.24 |
| mmu-miR-26a      | 9.43  | 0.31 | 5.48 | 0.90 | 8.28  | 1.03 |
| mmu-miR-29a      | 6.84  | 0.36 | 3.08 | 0.58 | 4.64  | 3.19 |
| mmu-miR-30d      | 4.64  | 0.77 | 2.92 | 0.89 | 2.50  | 2.22 |
| mmu-miR-31       | 2.64  | 0.63 | 4.56 | 0.69 | 2.20  | 1.71 |
| mmu-miR-320      | 5.98  | 0.72 | 3.64 | 0.67 | 2.95  | 2.04 |
| mmu-miR-342-3p   | 9.84  | 0.26 | 6.36 | 0.75 | 6.01  | 2.39 |
| mmu-miR-342-5p   | 6.79  | 0.45 | 3.18 | 0.97 | 2.25  | 1.50 |
| mmu-miR-361      | 6.56  | 0.43 | 3.86 | 0.57 | 3.91  | 2.59 |
| mmu-miR-378      | 6.85  | 0.49 | 3.22 | 0.08 | 3.36  | 2.74 |
| mmu-miR-423-5p   | 3.90  | 1.22 | 3.14 | 1.02 | 1.80  | 1.17 |
| mmu-miR-425      | 4.88  | 0.97 | 4.61 | 0.61 | 2.96  | 2.31 |
| mmu-miR-652      | 6.35  | 0.72 | 4.96 | 0.97 | 3.80  | 2.73 |
| mmu-miR-669c     | 3.93  | 1.54 | 2.40 | 0.54 | 1.62  | 1.18 |
| mmu-miR-674      | 4.49  | 0.31 | 3.36 | 0.75 | 1.94  | 1.46 |
| mmu-miR-744      | 4.34  | 1.04 | 4.31 | 0.60 | 2.05  | 1.32 |
| mmu-miR-92a      | 9.90  | 0.54 | 8.31 | 0.38 | 7.98  | 0.84 |

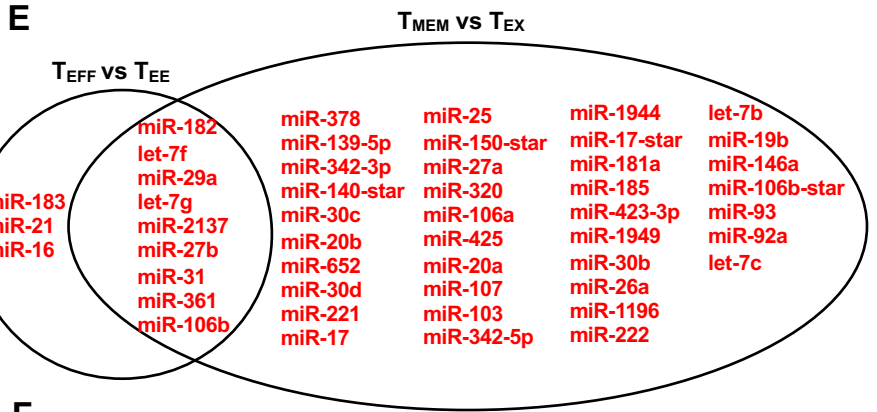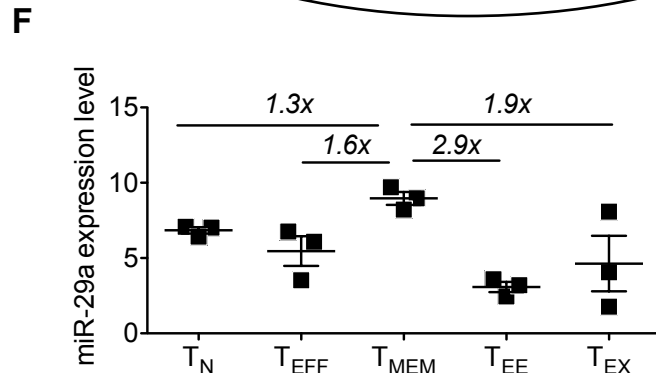

**Figure S2**

**A**

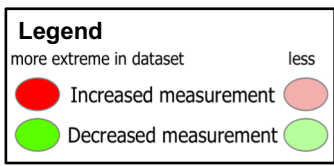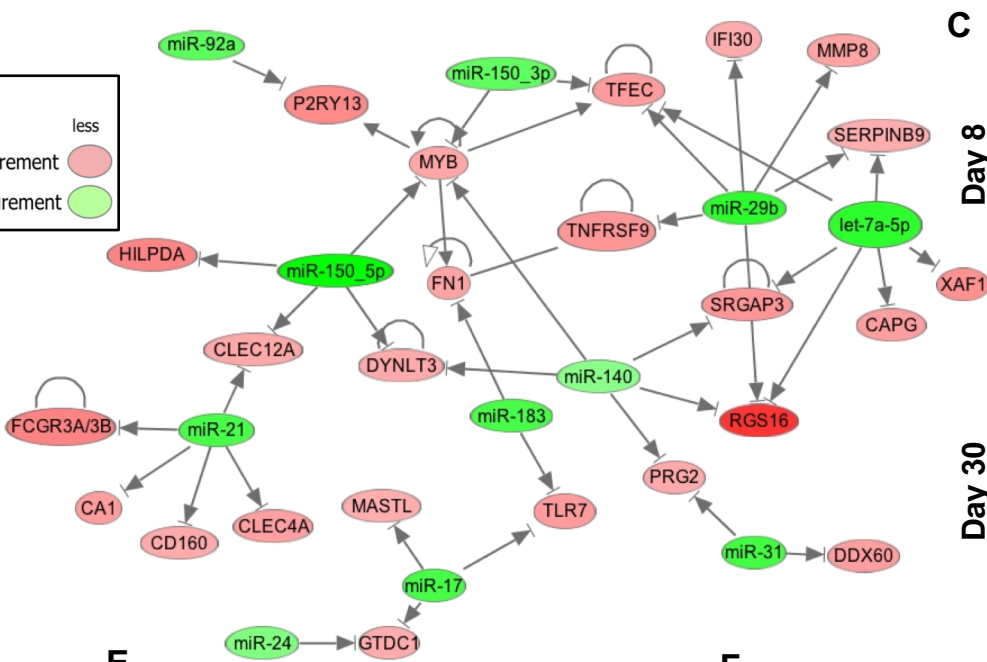

**C**

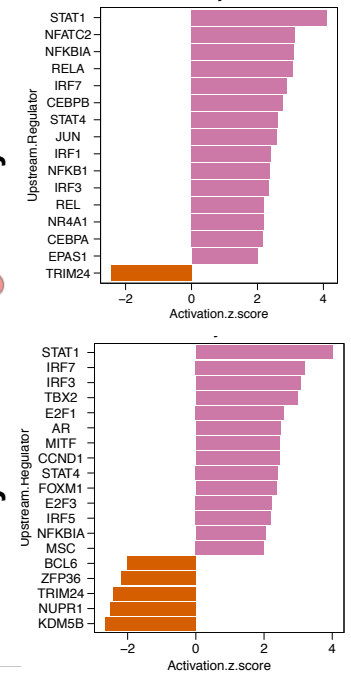

**B**

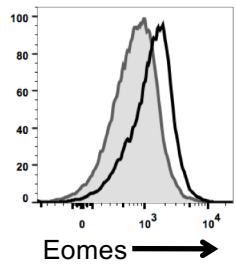

**E**

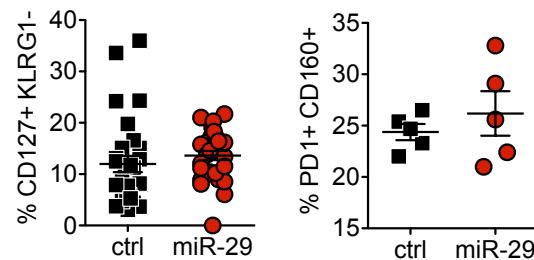

**F**

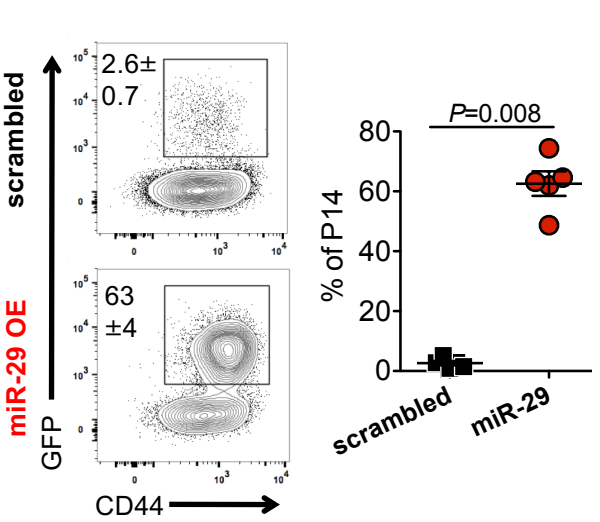

**D**

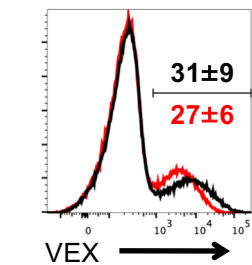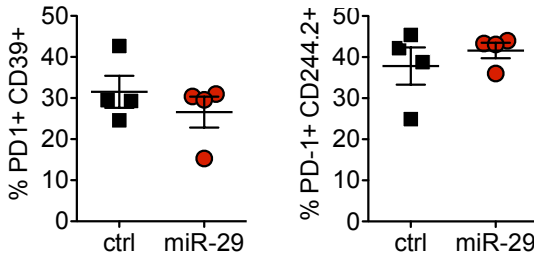

**G**

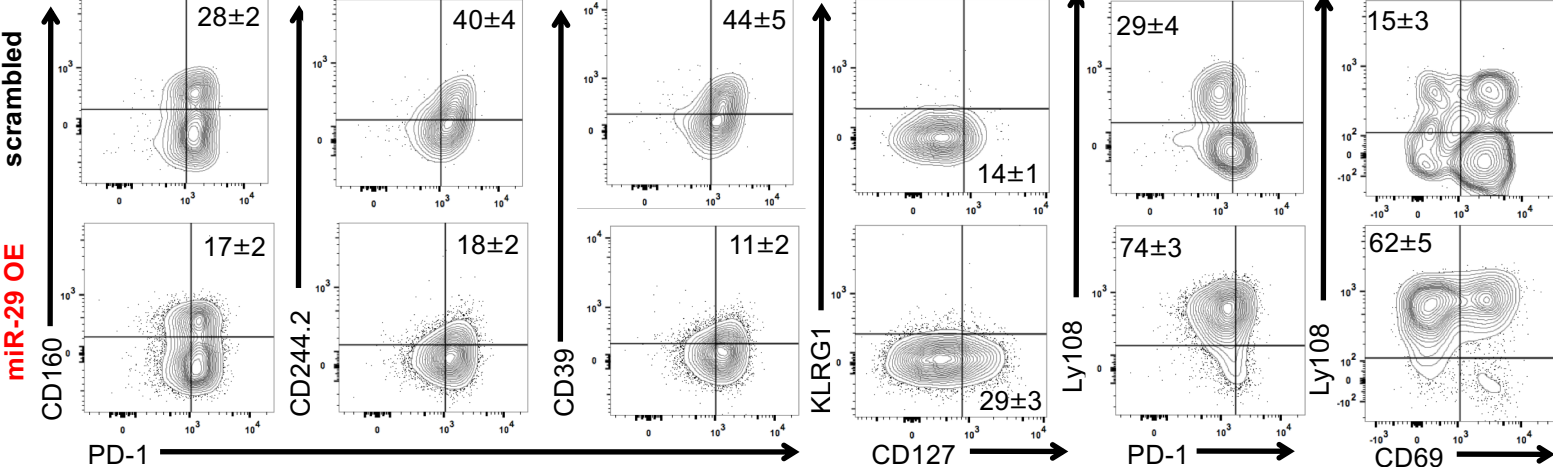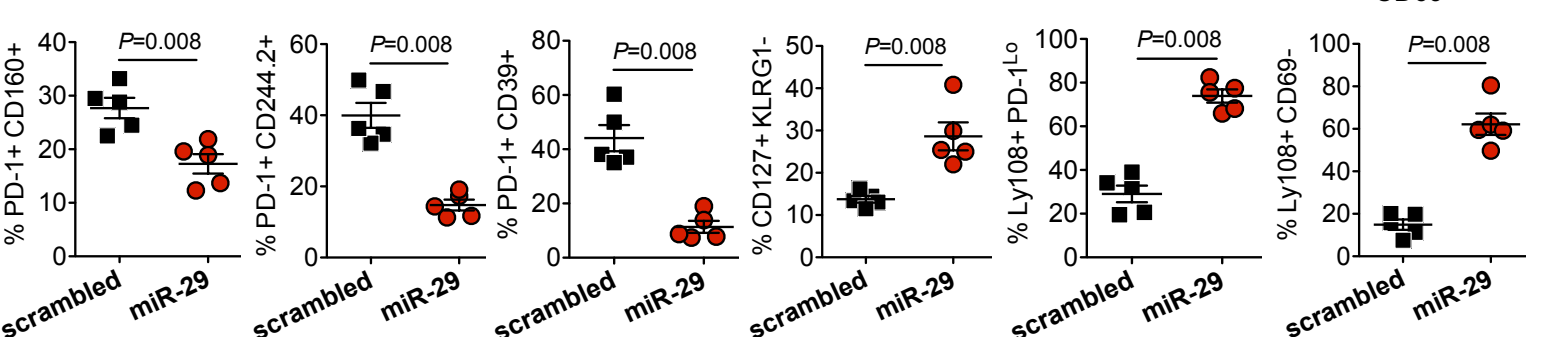

**Figure S3**

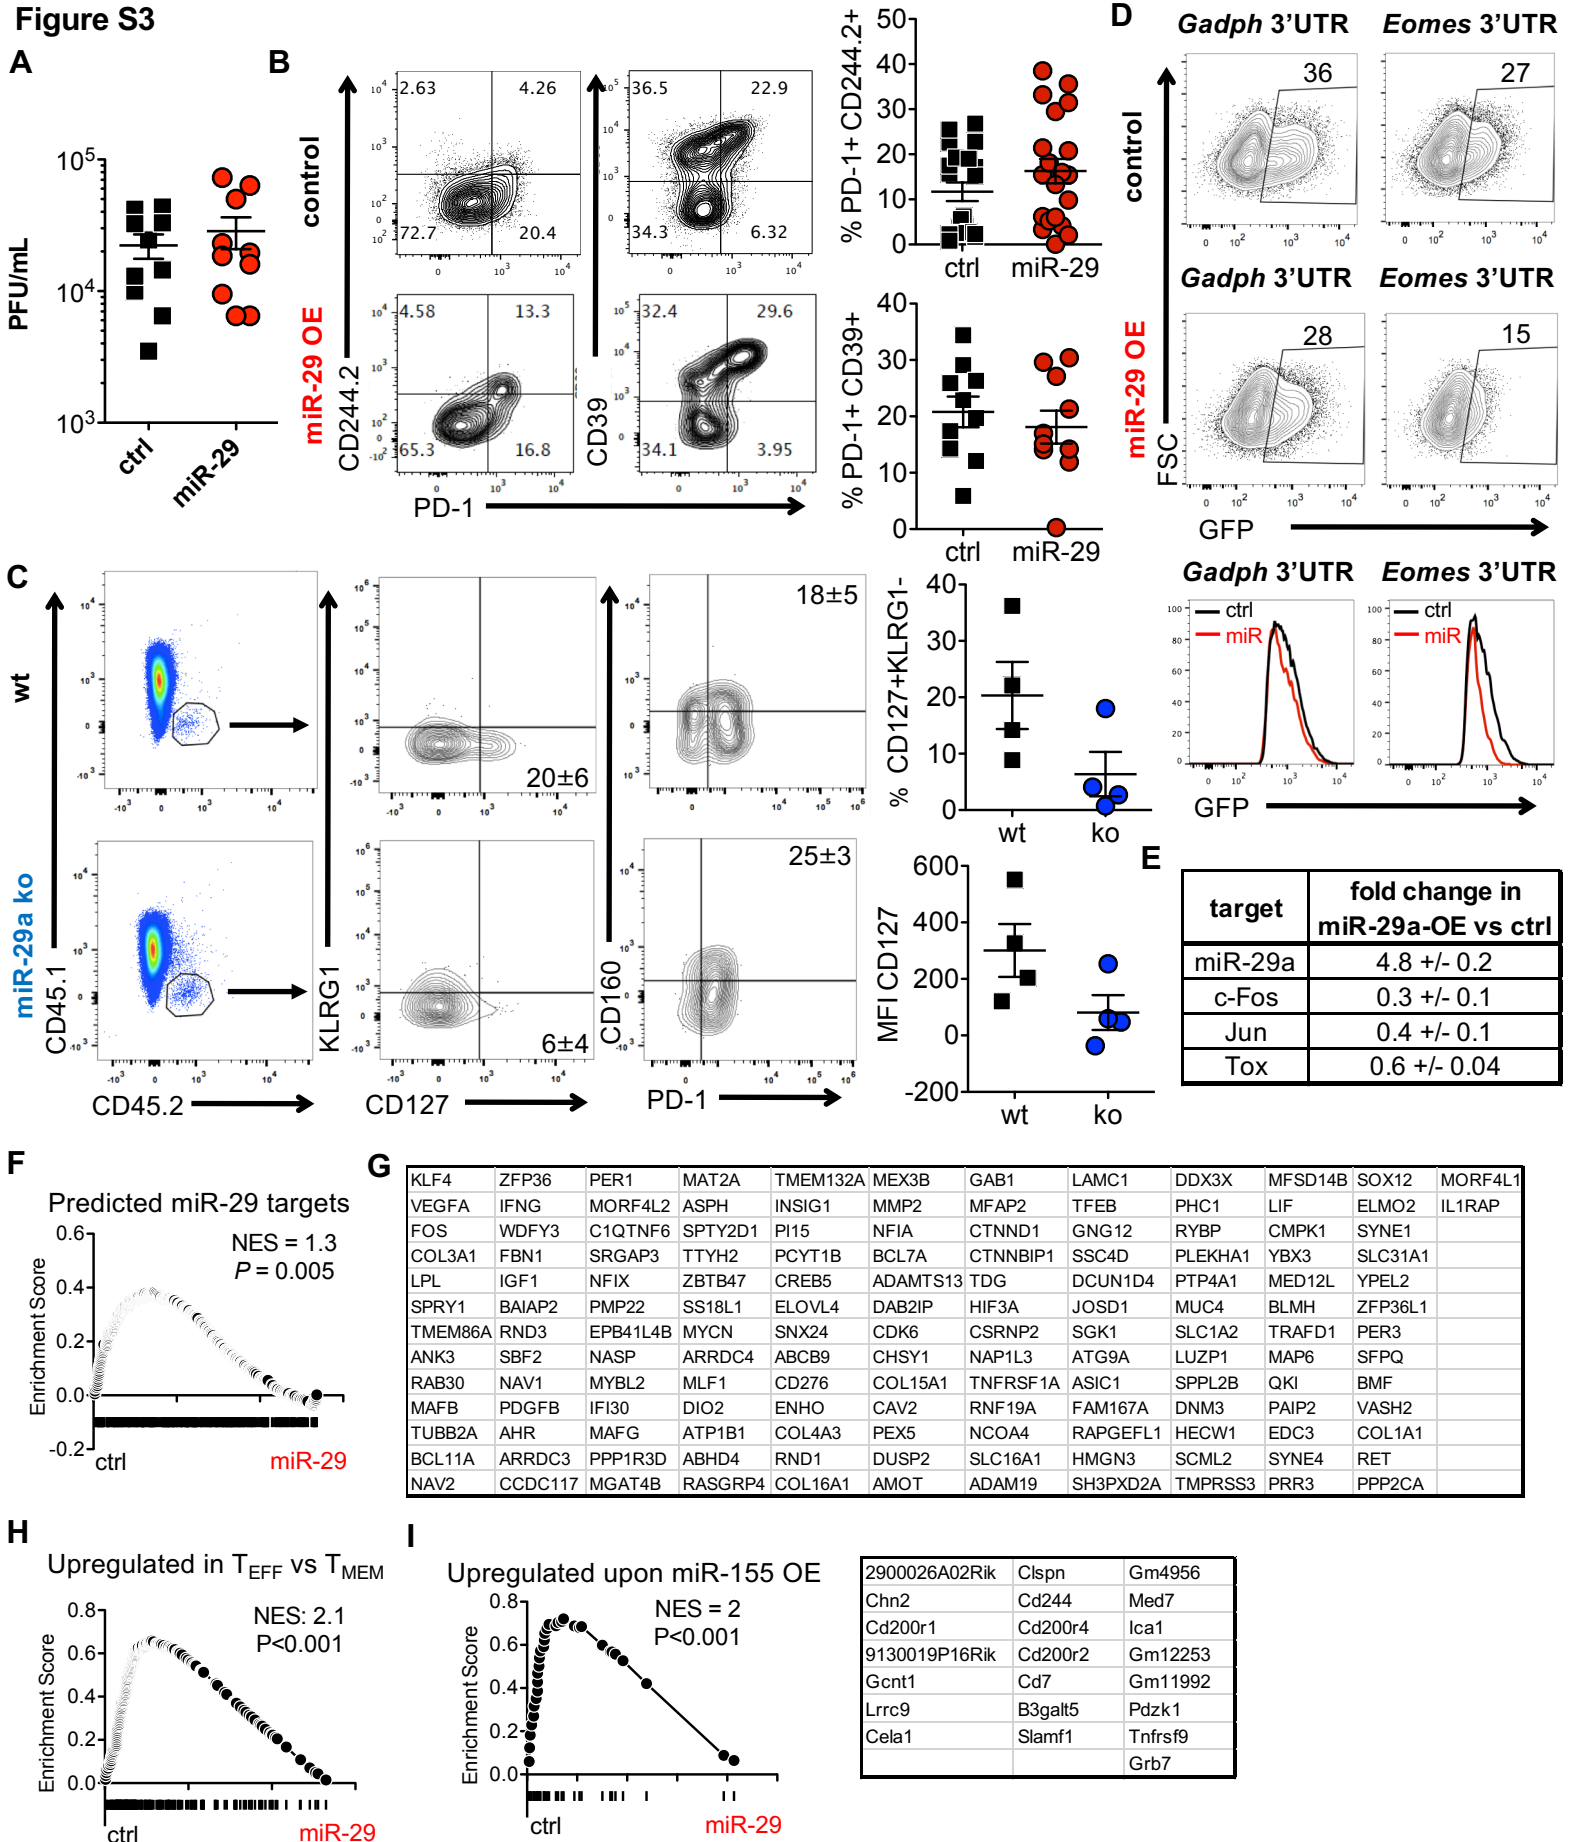

**Figure S4**

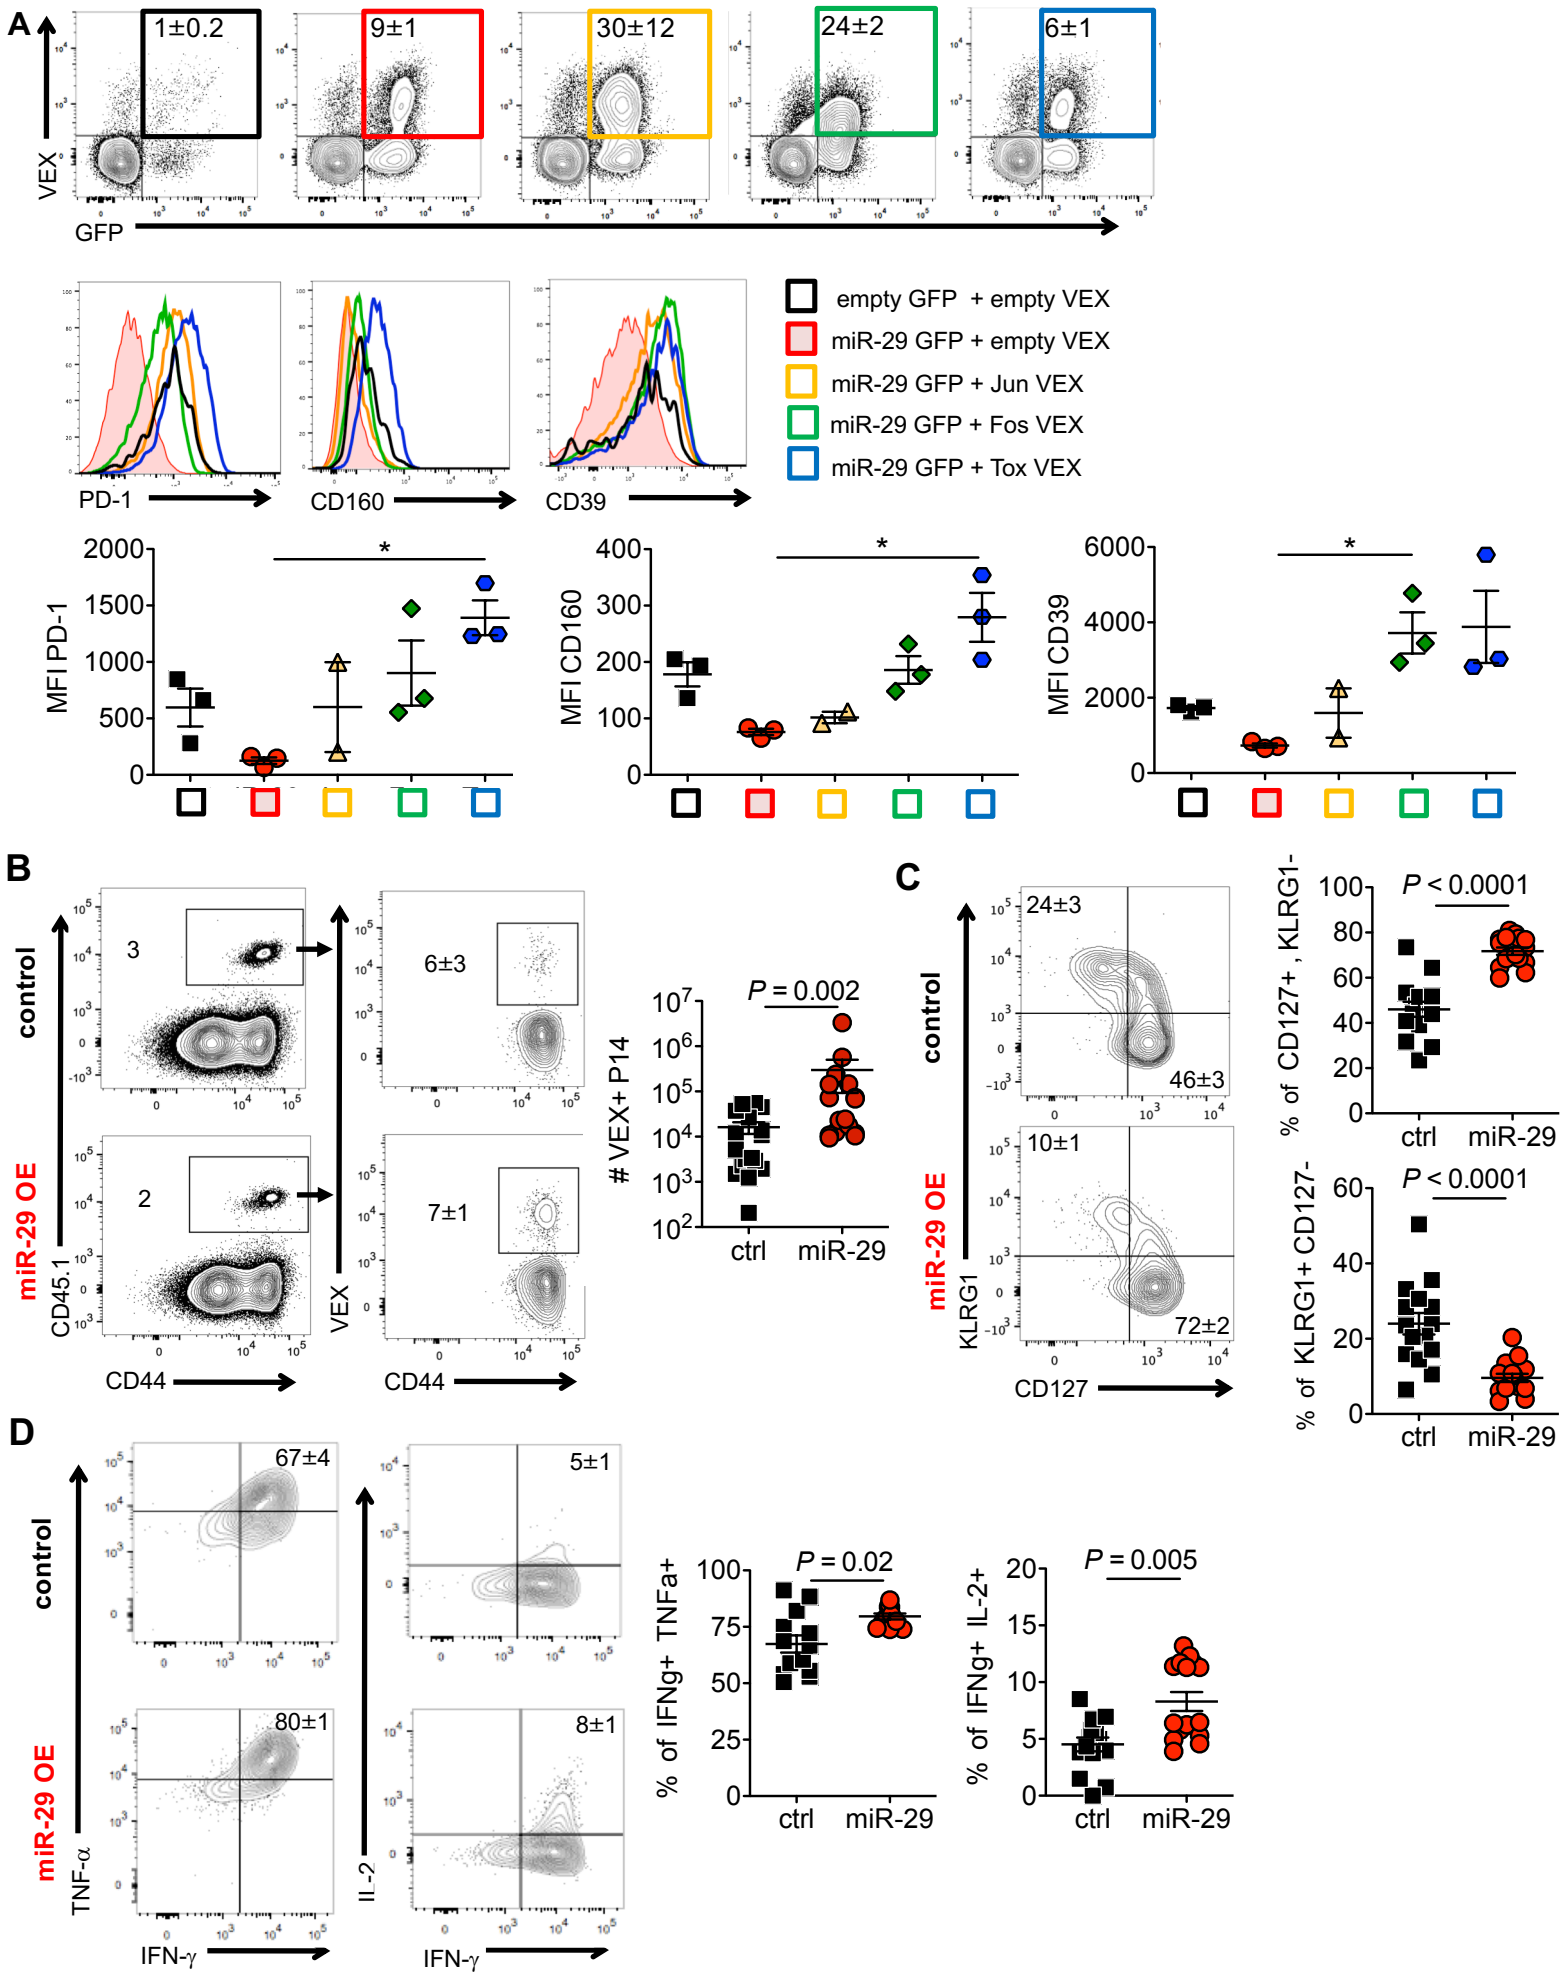

**Table S1. Differentially expressed transcripts with FDR<0.05 between ctrl and miR-29a-OE CD8 T cells.**

|                                                  | Gene                  | ID                    | Fold Change (log <sub>2</sub> ) | p-value    | FDR        |
|--------------------------------------------------|-----------------------|-----------------------|---------------------------------|------------|------------|
| <b>Upregulated in miR-29-OE versus control</b>   | Mir29a                | ENSMUSG00000065610.1  | 1.668854047                     | 2.24E-10   | 5.54E-07   |
|                                                  | Tcf7                  | ENSMUSG00000000782.15 | 0.837606356                     | 2.77E-07   | 0.00029363 |
|                                                  | Il7r                  | ENSMUSG00000003882.4  | 1.036851526                     | 7.02E-07   | 0.00057874 |
|                                                  | Gm1070                | ENSMUSG00000073018.5  | 1.134797738                     | 3.87E-06   | 0.00239011 |
|                                                  | Slamf6                | ENSMUSG00000015314.10 | 0.689871863                     | 6.12E-06   | 0.00349178 |
|                                                  | Irgb1                 | ENSMUSG00000025809.15 | 0.683290415                     | 5.94E-06   | 0.00349178 |
|                                                  | Tnfrsf26              | ENSMUSG00000045362.8  | 0.920397853                     | 6.72E-06   | 0.00369158 |
|                                                  | Gucy1a3               | ENSMUSG00000033910.13 | 1.026657351                     | 9.52E-06   | 0.00504384 |
|                                                  | Cd8b1                 | ENSMUSG00000053044.8  | 0.689611547                     | 1.63E-05   | 0.00733618 |
|                                                  | Car12                 | ENSMUSG00000032373.15 | 0.990193713                     | 5.26E-05   | 0.0199964  |
|                                                  | Rcn3                  | ENSMUSG00000019539.11 | 0.905058776                     | 0.00010431 | 0.03293237 |
|                                                  | Slc17a9               | ENSMUSG00000023393.15 | 0.745775601                     | 0.00010346 | 0.03293237 |
|                                                  | Smyd1                 | ENSMUSG00000055027.17 | 0.782633627                     | 0.00011533 | 0.03565184 |
|                                                  | Myopos                | ENSMUSG00000086533.2  | 0.747019306                     | 0.00013306 | 0.03956858 |
| Thy1                                             | ENSMUSG00000032011.5  | 0.545338348           | 0.00013334                      | 0.03956858 |            |
| Nt5e                                             | ENSMUSG00000032420.8  | 0.772793702           | 0.00018291                      | 0.05001543 |            |
| Il18r1                                           | ENSMUSG00000026070.15 | 0.617887008           | 0.00018539                      | 0.05001543 |            |
| <b>Downregulated in miR-29-OE versus control</b> | Hspa1b                | ENSMUSG00000090877.3  | -3.836339875                    | 5.92E-58   | 8.78E-54   |
|                                                  | Hspa1a                | ENSMUSG00000091971.3  | -3.612186398                    | 3.60E-47   | 2.67E-43   |
|                                                  | Hsph1                 | ENSMUSG00000029657.15 | -2.022076315                    | 2.84E-18   | 1.40E-14   |
|                                                  | Hsp90aa1              | ENSMUSG00000021270.13 | -1.170705347                    | 6.21E-18   | 2.30E-14   |
|                                                  | Dnajb1                | ENSMUSG00000005483.10 | -1.677951352                    | 8.83E-15   | 2.62E-11   |
|                                                  | Rhob                  | ENSMUSG000000054364.5 | -1.327772421                    | 2.91E-10   | 6.17E-07   |
|                                                  | Dnaja1                | ENSMUSG00000028410.13 | -1.24743132                     | 3.52E-10   | 6.53E-07   |
|                                                  | Ubc                   | ENSMUSG00000008348.9  | -0.8749174                      | 7.37E-10   | 1.21E-06   |
|                                                  | Jun                   | ENSMUSG00000052684.4  | -1.24247249                     | 1.64E-09   | 2.44E-06   |
|                                                  | Csf1                  | ENSMUSG00000014599.10 | -1.360611353                    | 4.24E-09   | 5.72E-06   |
|                                                  | Gm26532               | ENSMUSG00000097296.1  | -1.363372744                    | 5.34E-09   | 6.61E-06   |
|                                                  | Gm37352               | ENSMUSG000000103593.1 | -0.996462023                    | 2.37E-07   | 0.00027027 |
|                                                  | Rgs1                  | ENSMUSG00000026358.13 | -1.10662335                     | 3.05E-07   | 0.00030129 |
|                                                  | Tox                   | ENSMUSG00000041272.11 | -0.788926088                    | 3.32E-07   | 0.00030769 |
|                                                  | Vcam1                 | ENSMUSG00000027962.14 | -0.912440861                    | 5.49E-07   | 0.00047892 |
|                                                  | Slc40a1               | ENSMUSG00000025993.10 | -0.897654665                    | 1.45E-06   | 0.00113368 |
|                                                  | Gm26802               | ENSMUSG00000097266.1  | -1.242648356                    | 2.69E-06   | 0.00199341 |
|                                                  | Ilgad                 | ENSMUSG00000070369.13 | -0.908780518                    | 3.48E-06   | 0.00239011 |
|                                                  | Fos                   | ENSMUSG00000021250.13 | -1.08225231                     | 3.77E-06   | 0.00239011 |
|                                                  | Igkv4-80              | ENSMUSG00000076540.3  | -1.225085692                    | 3.65E-06   | 0.00239011 |
|                                                  | Gzmk                  | ENSMUSG00000042385.14 | -0.737611022                    | 1.14E-05   | 0.00584089 |
|                                                  | Gm8696                | ENSMUSG00000092557.1  | -1.075828644                    | 1.37E-05   | 0.00675953 |
|                                                  | Hspa8                 | ENSMUSG00000015656.17 | -0.557022286                    | 1.53E-05   | 0.00733176 |
|                                                  | Klf6                  | ENSMUSG00000000078.6  | -0.834988394                    | 1.58E-05   | 0.00733176 |
|                                                  | Gla                   | ENSMUSG00000031266.6  | -1.008648449                    | 1.86E-05   | 0.00810067 |
|                                                  | Ccl3                  | ENSMUSG00000000982.5  | -1.022573671                    | 3.67E-05   | 0.01555889 |
|                                                  | Klf4                  | ENSMUSG00000003032.8  | -0.942095263                    | 4.25E-05   | 0.01752651 |
|                                                  | Morf4l2               | ENSMUSG00000031422.16 | -0.64176507                     | 4.59E-05   | 0.01792211 |
|                                                  | Rasgef1b              | ENSMUSG00000089809.9  | -1.041056627                    | 4.59E-05   | 0.01792211 |
|                                                  | Entpd1                | ENSMUSG00000048120.16 | -0.696113773                    | 5.66E-05   | 0.02098333 |
|                                                  | Gem                   | ENSMUSG00000028214.13 | -0.970158208                    | 7.06E-05   | 0.02493458 |
|                                                  | Lmna                  | ENSMUSG00000028063.15 | -1.037806404                    | 7.03E-05   | 0.02493458 |
|                                                  | Zfand2a               | ENSMUSG00000053581.13 | -0.988401993                    | 7.83E-05   | 0.02701972 |
|                                                  | Hspa5                 | ENSMUSG00000026864.13 | -0.6017439                      | 9.47E-05   | 0.03193246 |
|                                                  | Hmox1                 | ENSMUSG00000005413.8  | -0.790388106                    | 9.96E-05   | 0.03285255 |
|                                                  | Gm6297                | ENSMUSG00000097123.1  | -0.984276445                    | 0.00014919 | 0.04340507 |
|                                                  | Bag3                  | ENSMUSG00000030847.8  | -0.717392403                    | 0.00017735 | 0.0496501  |
|                                                  | Selenon               | ENSMUSG00000050989.9  | -0.747482099                    | 0.00017515 | 0.0496501  |
|                                                  | Anxa3                 | ENSMUSG00000029484.12 | -0.979858736                    | 0.00019157 | 0.05075884 |
|                                                  | Mrc1                  | ENSMUSG000000026712.3 | -0.766719089                    | 0.00019599 | 0.05101822 |
|                                                  | Prdm1                 | ENSMUSG00000038151.13 | -0.658486597                    | 0.0002103  | 0.05373589 |
|                                                  | Hdc                   | ENSMUSG00000027360.5  | -0.974183547                    | 0.00021367 | 0.05373589 |
| Ccl4                                             | ENSMUSG00000018930.3  | -0.919504465          | 0.00021933                      | 0.05424026 |            |



**Table S2. Pathway analysis reveals a role for miR-29a in regulating ribosomal pathways.**

|                                      | Pathway                                                                                                           | NES         | p-value     | FDR q-val   |
|--------------------------------------|-------------------------------------------------------------------------------------------------------------------|-------------|-------------|-------------|
| Enriched in control versus miR-29-OE | GO_HEPARIN_BINDING                                                                                                | 1.9998995   | 0           | 9.87E-04    |
|                                      | GO_GLYCOSAMINOGLYCAN_BINDING                                                                                      | 1.9728819   | 0           | 0.001476214 |
|                                      | GO_VIRUS_RECEPTOR_ACTIVITY                                                                                        | 1.9051809   | 0           | 0.005832384 |
|                                      | GO_CARGO_RECEPTOR_ACTIVITY                                                                                        | 1.8843999   | 0           | 0.008010143 |
|                                      | GO_PROTEIN_PHOSPHATASE_1_BINDING                                                                                  | 1.8753409   | 0           | 0.006787285 |
|                                      | GO_CHEMOKINE_RECEPTOR_BINDING                                                                                     | 1.8591025   | 0           | 0.007598455 |
|                                      | GO_CHEMOKINE_ACTIVITY                                                                                             | 1.853316    | 0           | 0.007057953 |
|                                      | GO_ANTIGEN_BINDING                                                                                                | 1.8529849   | 0           | 0.006295385 |
|                                      | GO_ANKYRIN_BINDING                                                                                                | 1.8371035   | 0           | 0.007966366 |
|                                      | GO_PROTEIN_SERINE_THREONINE_KINASE_INHIBITOR_ACTIVITY                                                             | 1.833835    | 0           | 0.007461031 |
|                                      | GO_INTEGRIN_BINDING                                                                                               | 1.7880956   | 0           | 0.01530952  |
|                                      | GO_SULFUR_COMPOUND_BINDING                                                                                        | 1.7853351   | 0           | 0.015010715 |
|                                      | GO_MHC_PROTEIN_COMPLEX_BINDING                                                                                    | 1.7828696   | 0.001298701 | 0.014225458 |
|                                      | GO_CCR_CHEMOKINE_RECEPTOR_BINDING                                                                                 | 1.7790247   | 0           | 0.014453033 |
|                                      | GO_G_PROTEIN_COUPLED_CHEMOATTRACTANT_RECEPTOR_ACTIVITY                                                            | 1.7742513   | 0           | 0.014843537 |
|                                      | GO_LIPOPOLYSACCHARIDE_BINDING                                                                                     | 1.7636839   | 0.002604167 | 0.016581804 |
|                                      | GO_TRANSCRIPTIONAL_ACTIVATOR_ACTIVITY_RNA_POLYMERASE_II_TRANSCRIPTION_REGULATORY_REGION_SEQUENCE_SPECIFIC_BINDING | 1.7485485   | 0           | 0.019711105 |
|                                      | GO_CELL_ADHESION_MOLECULE_BINDING                                                                                 | 1.7133139   | 0           | 0.034570206 |
|                                      | GO_SIGNALING_PATTERN_RECOGNITION_RECEPTOR_ACTIVITY                                                                | 1.6940093   | 0.002663116 | 0.04318708  |
|                                      | GO_COLLAGEN_BINDING                                                                                               | 1.6919171   | 0.001128668 | 0.04209192  |
|                                      | GO_TRANSCRIPTION_FACTOR_ACTIVITY_RNA_POLYMERASE_II_CORE_PROMOTER_PROXIMAL_REGION_SEQUENCE_SPECIFIC_BINDING        | 1.6858249   | 0           | 0.04437762  |
|                                      | GO_TRANSCRIPTIONAL_REPRESSOR_ACTIVITY_RNA_POLYMERASE_II_CORE_PROMOTER_PROXIMAL_REGION_SEQUENCE_SPECIFIC_BINDING   | 1.6852046   | 0           | 0.042844445 |
|                                      | GO_E_BOX_BINDING                                                                                                  | 1.6837938   | 0.002604167 | 0.041654456 |
|                                      | GO_GROWTH_FACTOR_ACTIVITY                                                                                         | 1.6812968   | 0           | 0.041535128 |
|                                      | GO_ARF_GUANYL_NUCLEOTIDE_EXCHANGE_FACTOR_ACTIVITY                                                                 | 1.6802255   | 0.00249066  | 0.040379133 |
|                                      | GO_SPECTRIN_BINDING                                                                                               | 1.6797727   | 0.003963012 | 0.03901474  |
|                                      | GO_SCAVENGER_RECEPTOR_ACTIVITY                                                                                    | 1.6770134   | 0.002392344 | 0.03928865  |
|                                      | GO_HISTONE_DEACETYLASE_BINDING                                                                                    | 1.6709392   | 0           | 0.041314952 |
|                                      | GO_CYTOKINE_RECEPTOR_ACTIVITY                                                                                     | 1.6684775   | 0           | 0.041325763 |
|                                      | GO_TRANSCRIPTIONAL_ACTIVATOR_ACTIVITY_RNA_POLYMERASE_II_CORE_PROMOTER_PROXIMAL_REGION_SEQUENCE_SPECIFIC_BINDING   | 1.6628654   | 0           | 0.04340573  |
|                                      | GO_TRANSMEMBRANE_RECEPTOR_PROTEIN_KINASE_ACTIVITY                                                                 | 1.6586456   | 0.002207506 | 0.044135597 |
|                                      | GO_UNFOLDED_PROTEIN_BINDING                                                                                       | 1.6447593   | 0.001059322 | 0.05113535  |
| GO_PROTEIN_LIPID_COMPLEX_BINDING     | 1.6384453                                                                                                         | 0.003821656 | 0.054071985 |             |
| Enriched in miR-29-OE versus control | GO_STRUCTURAL_CONSTITUENT_OF_RIBOSOME                                                                             | -2.64858    | 0           | 0           |
|                                      | GO_RRNA_BINDING                                                                                                   | -2.228179   | 0           | 0.002554956 |
|                                      | GO_TRANSFERASE_ACTIVITY_TRANSFERRING_ONE_CARBON_GROUPS                                                            | -2.1660686  | 0           | 0.00329212  |
|                                      | GO_S_ADENOSYLMETHIONINE_DEPENDENT_METHYLTRANSFERASE_ACTIVITY                                                      | -2.118749   | 0           | 0.003431993 |
|                                      | GO_N_METHYLTRANSFERASE_ACTIVITY                                                                                   | -1.9876801  | 0           | 0.013086284 |
|                                      | GO_INTRAMOLECULAR_TRANSFERASE_ACTIVITY                                                                            | -1.9746794  | 0           | 0.014042074 |
|                                      | GO_TRNA_BINDING                                                                                                   | -1.9109718  | 0           | 0.021631014 |
|                                      | GO_RNA_METHYLTRANSFERASE_ACTIVITY                                                                                 | -1.8186724  | 0           | 0.046576265 |

**Table S3. miR-29a abrogates the response to antigen signaling and inflammation.**

|                                             | <b>Pathway</b>                             | <b>NES</b> | <b>p-value</b> | <b>FDR q-val</b> |
|---------------------------------------------|--------------------------------------------|------------|----------------|------------------|
| <b>Enriched in control versus miR-29-OE</b> | HALLMARK_TNFA_SIGNALING_VIA_NFKB           | 2.2810934  | 0              | 0                |
|                                             | HALLMARK_INFLAMMATORY_RESPONSE             | 2.0561085  | 0              | 0                |
|                                             | HALLMARK_COAGULATION                       | 1.9774284  | 0              | 0                |
|                                             | HALLMARK_ANGIOGENESIS                      | 1.933186   | 0              | 2.55E-04         |
|                                             | HALLMARK_G2M_CHECKPOINT                    | 1.8838992  | 0              | 2.04E-04         |
|                                             | HALLMARK_HEME_METABOLISM                   | 1.8640239  | 0              | 1.70E-04         |
|                                             | HALLMARK_APOPTOSIS                         | 1.859348   | 0              | 1.46E-04         |
|                                             | HALLMARK_EPITHELIAL_MESENCHYMAL_TRANSITION | 1.8552928  | 0              | 1.28E-04         |
|                                             | HALLMARK_COMPLEMENT                        | 1.8386849  | 0              | 1.13E-04         |
|                                             | HALLMARK_HYPOXIA                           | 1.8294535  | 0              | 1.02E-04         |
|                                             | HALLMARK_IL6_JAK_STAT3_SIGNALING           | 1.8015174  | 0              | 2.75E-04         |
|                                             | HALLMARK_E2F_TARGETS                       | 1.7769446  | 0              | 3.35E-04         |
|                                             | HALLMARK_UV_RESPONSE_UP                    | 1.7716143  | 0              | 3.09E-04         |
|                                             | HALLMARK_KRAS_SIGNALING_UP                 | 1.7480567  | 0              | 3.59E-04         |
|                                             | HALLMARK_TGF_BETA_SIGNALING                | 1.6921066  | 0              | 0.001133623      |
|                                             | HALLMARK_CHOLESTEROL_HOMEOSTASIS           | 1.6551964  | 0.003267974    | 0.001880865      |
|                                             | HALLMARK_IL2_STAT5_SIGNALING               | 1.6289208  | 0              | 0.002657183      |
|                                             | HALLMARK_UV_RESPONSE_DN                    | 1.6220567  | 0              | 0.002565117      |
|                                             | HALLMARK_P53_PATHWAY                       | 1.6194744  | 0              | 0.00258922       |
|                                             | HALLMARK_MITOTIC_SPINDLE                   | 1.6024842  | 0              | 0.002860379      |
|                                             | HALLMARK_APICAL_SURFACE                    | 1.588868   | 0.007083825    | 0.003196554      |
|                                             | HALLMARK_ESTROGEN_RESPONSE_LATE            | 1.5846844  | 0              | 0.003459575      |
|                                             | HALLMARK_INTERFERON_GAMMA_RESPONSE         | 1.5592397  | 0              | 0.004677468      |
|                                             | HALLMARK_ESTROGEN_RESPONSE_EARLY           | 1.5591127  | 0              | 0.004482574      |
|                                             | HALLMARK_ALLOGRAFT_REJECTION               | 1.5342426  | 0              | 0.006175945      |
|                                             | HALLMARK_APICAL_JUNCTION                   | 1.5327951  | 0              | 0.00605468       |
|                                             | HALLMARK_MYOGENESIS                        | 1.5304984  | 0              | 0.006056665      |
|                                             | HALLMARK_MTORC1_SIGNALING                  | 1.482623   | 0              | 0.010572976      |
|                                             | HALLMARK_GLYCOLYSIS                        | 1.4380513  | 0.002026343    | 0.017641183      |
|                                             | HALLMARK_PEROXISOME                        | 1.43582    | 0.013948498    | 0.017618116      |
| HALLMARK_REACTIVE_OXYGEN_SPECIES_PATHWAY    | 1.3476757                                  | 0.06849315 | 0.048815593    |                  |

**Table S4. GSEA analysis implicates major transcription factors regulation by miR-29a.**

|                                             | <b>Pathway</b>               | <b>NES</b>  | <b>p-value</b> | <b>FDR q-val</b> |
|---------------------------------------------|------------------------------|-------------|----------------|------------------|
| <b>Enriched in control versus miR-29-OE</b> | PID_AP1_PATHWAY              | 2.2547114   | 0              | 0                |
|                                             | PID_CMYB_PATHWAY             | 2.1555052   | 0              | 0                |
|                                             | PID_FRA_PATHWAY              | 2.004249    | 0              | 3.54E-04         |
|                                             | PID_ATF2_PATHWAY             | 1.9475356   | 0              | 2.66E-04         |
|                                             | PID_NFAT_TFPATHWAY           | 1.908189    | 0              | 0.001312842      |
|                                             | PID_GMCSF_PATHWAY            | 1.8937105   | 0              | 0.001637884      |
|                                             | PID_FGF_PATHWAY              | 1.8743266   | 0              | 0.001875016      |
|                                             | PID_UPA_UPAR_PATHWAY         | 1.8653686   | 0              | 0.002060084      |
|                                             | PID_INTEGRIN3_PATHWAY        | 1.8543769   | 0              | 0.001831186      |
|                                             | PID_AURORA_B_PATHWAY         | 1.852264    | 0              | 0.001755662      |
|                                             | PID_IL23_PATHWAY             | 1.8099326   | 0              | 0.004490031      |
|                                             | PID_INTEGRIN1_PATHWAY        | 1.8022411   | 0              | 0.004670415      |
|                                             | PID_FOXM1_PATHWAY            | 1.7934716   | 0.001180638    | 0.004564447      |
|                                             | PID_INTEGRIN_A9B1_PATHWAY    | 1.7898757   | 0.001215067    | 0.004473784      |
|                                             | PID_LYSOPHOSPHOLIPID_PATHWAY | 1.7629633   | 0              | 0.0069737        |
|                                             | PID_AVB3_OPN_PATHWAY         | 1.7628356   | 0.001177856    | 0.006537844      |
|                                             | PID_AURORA_A_PATHWAY         | 1.7592673   | 0.003558719    | 0.006416565      |
|                                             | PID_NCADHERIN_PATHWAY        | 1.7560147   | 0.00118624     | 0.006548575      |
|                                             | PID_PLK1_PATHWAY             | 1.7433734   | 0.001137656    | 0.007844676      |
|                                             | PID_AVB3_INTEGRIN_PATHWAY    | 1.7406168   | 0              | 0.007780236      |
|                                             | PID_TCR_CALCIIUM_PATHWAY     | 1.7356753   | 0.002409639    | 0.008512248      |
|                                             | PID_INTEGRIN2_PATHWAY        | 1.6987184   | 0.007556675    | 0.013878844      |
|                                             | PID_INTEGRIN_A4B1_PATHWAY    | 1.6825811   | 0.003525264    | 0.017312404      |
|                                             | PID_S1P_S1P2_PATHWAY         | 1.6801293   | 0.002567394    | 0.016961047      |
|                                             | PID_FCER1_PATHWAY            | 1.669008    | 0.001091703    | 0.018622821      |
|                                             | PID_NECTIN_PATHWAY           | 1.647273    | 0.006031363    | 0.025575753      |
|                                             | PID_AJDISS_2PATHWAY          | 1.6435955   | 0.002325581    | 0.025613196      |
|                                             | PID_HIF1_TFPATHWAY           | 1.6431552   | 0.003278689    | 0.024815701      |
|                                             | PID_SYNDECAN_1_PATHWAY       | 1.6359407   | 0.002344666    | 0.026237834      |
|                                             | PID_BCR_5PATHWAY             | 1.6193848   | 0.002176279    | 0.03135541       |
|                                             | PID_PTP1B_PATHWAY            | 1.6159371   | 0.005780347    | 0.031833865      |
|                                             | PID_AR_TF_PATHWAY            | 1.6091808   | 0.005586592    | 0.0335987        |
|                                             | PID_TCPTP_PATHWAY            | 1.596056    | 0.00820633     | 0.03783006       |
|                                             | PID_E2F_PATHWAY              | 1.5849514   | 0.002190581    | 0.04188783       |
|                                             | PID_REG_GR_PATHWAY           | 1.582815    | 0              | 0.041841634      |
|                                             | PID_TOLL_ENDOGENOUS_PATHWAY  | 1.5810785   | 0.008728179    | 0.04174853       |
|                                             | PID_PI3KCI_PATHWAY           | 1.5708923   | 0.012127894    | 0.04646383       |
|                                             | PID_RET_PATHWAY              | 1.5676435   | 0.007168459    | 0.047392823      |
|                                             | PID_MET_PATHWAY              | 1.566764    | 0.001068376    | 0.04660435       |
|                                             | PID_RAC1_PATHWAY             | 1.5647382   | 0.006711409    | 0.046271548      |
| PID_IL4_2PATHWAY                            | 1.5534688                    | 0.011866235 | 0.05104758     |                  |
